# Supplementary material for: A rational design of efficient trifunctional electrocatalysts derived from tailored Co2+-functionalized anionic metal–organic frameworks
Source: Royal Society of Chemistry journal article supplement (doi:10.1039/c9dt04930d), 2020-01-01
Supplement: c9dt04930d1.pdf [file c9dt04930d1.pdf]

## Supporting Information

Rational design of efficient trifunctional electrocatalyst derived from tailored  $\text{Co}^{2+}$  functionalized anionic metal-organic frameworks

Miaojie Shi<sup>a,c</sup>, Jun-Hao Wang<sup>a,\*</sup>, Ying Zhang<sup>c</sup> and Xian-Ming Zhang<sup>a,b,\*</sup>

<sup>a</sup> *Institute of Crystalline Materials, Shanxi University, Taiyuan 030006, China*

<sup>b</sup> *School of Chemistry and Material Science, Shanxi Normal University, Linfen 041004, China*

<sup>c</sup> *Institute of Molecular Science, Shanxi University, Taiyuan 030006, China*

Corresponding author

\*E-mail address: [jhwang@sxu.edu.cn](mailto:jhwang@sxu.edu.cn) (Jun-Hao Wang);

\*E-mail address: [zhangxm@dns.sxnu.edu.cn](mailto:zhangxm@dns.sxnu.edu.cn) (Xian-Ming Zhang)

## Experimental section

### *1 Preparation of materials*

#### *1.1. Preparation of Co-TPM Complex*

Tris (pyrazol-1-yl) methane (TPM) was prepared following the protocol described earlier.<sup>1</sup> Co-TPM complex was prepared according to previous reports with slight modification.<sup>2</sup> Firstly,  $\text{Co}(\text{NO}_3)_2 \cdot 6\text{H}_2\text{O}$  (1 mmol) was dissolved in 10 mL of acetone and TPM (2 mmol) was dissolved in another 20 mL of acetone. After adding the cobalt salt solution into TPM solution with stirring, the two solutions were mixed quickly and kept stirring at room temperature for 1h. The precipitates formed were collected by centrifugation, washed with ethanol, and then dried at room temperature to obtain yellow Co-TPM powders.

#### *1.2. Preparation of $\text{NH}_4@\text{Zn}_3\text{OH}(\text{PzC})_3$ (denoted as A@MOF) and different Co@MOF samples*

A@MOF was prepared following the protocol described earlier<sup>3</sup>.

Co@MOF-T was prepared as follows: adding 10 mL ammonia solution of  $\text{Zn}(\text{NO}_3)_2$  (3 mmol) and then 10mL methanol solution of 4-pyrazolecarboxylic acid ( $\text{H}_2\text{PzC}$ ) (3 mmol) into DMF solution of Co-TPM (0.3 mmol, 40 mL) in a round flask and then reacting under refluxing for about 6 hours. Light red powders were obtained and collected by filtrating, washing with DMF and  $\text{CH}_3\text{OH}$  for three times, respectively.

Co@MOF-I was prepared following the same procedure as Co@MOF-T by using  $\text{Co}(\text{NO}_3)_2 \cdot 6\text{H}_2\text{O}$  instead of Co-TPM as Co sources.

Co@MOF-E was prepared by exchange strategy. In a typical experiment, the sample of A@MOF was suspended in methanolic solution of Cobaltous nitrate for four days, with the

methanol solution refreshed in every two days. The exchanged solids were subsequently filtered, washed with methanol for 3 times and later on suspended in methanol for 12 hours, filtered and then dried under vacuum at 60 °C for 12 hours.

### *1.3. Preparation of CoT@NC, CoI@NC, CoE@NC and NC*

The as-obtained MOFs samples (Co@MOF-T, Co@MOF-I, Co@MOF-E and A@MOF) were subjected to pyrolysis by placing them in a ceramic boat and heated under 800 ° C for 2 h in a tube furnace at a ramp rate of 1.5 ° C min<sup>-1</sup> under nitrogen atmosphere. After cooling the furnace naturally, the dark black products were collected, respectively. The resultant products *CoT@NC*, *CoI@NC*, *CoE@NC* and *NC* catalysts were then directly used as ORR, HER and OER electrocatalysts without further treatment.

### *2.. Physicochemical Characterization*

Powder X-ray diffraction (PXRD) patterns were collected on a Rigaku Ultima IV X-ray diffractometer with a scanning rate of 1°/2  $\theta$  min<sup>-1</sup> using Cu K $\alpha$  ( $\lambda$  = 0.15406 nm) radiation at 40 kV and 40 mA. The scanning electron microscope (SEM) graphs were taken under JEOL-JSM-6701 field-emission scanning microscope (FE-SEM). Transmission electron microscope (TEM) was carried out on a FEI Tecnai G2 F20S-Twin using an accelerating voltage of 200 kV. The X-ray photoelectron spectra (XPS) were analyzed on the PHI-5702 instrument and the C1s line at 284.5 eV was used as the binding energy reference. The N<sub>2</sub> adsorption-desorption isotherms were obtained on a Quantachrome autosorb iQ instrument, a liquid nitrogen bath (77 K) and ultra-high purity grade nitrogen and helium were used for the nitrogen adsorption experiment. The specific surface area (SSA) was calculated according to the Brunauer-Emmett-Teller (BET) method based on the adsorption isotherm. The Non-local Density-Functional-Theory (NLDFT) method was used to

calculate the pore volume and the pore size distribution (PSDs). Raman spectra are collected on a Renishaw in Via microlaser Raman spectrometer with a 514.5 nm laser excitation. The content of cobalt in the catalysts was determined using inductively coupled plasma mass spectrometry spectrometer (ICP-MS) on a PE NexION 350.

### 3. Electrochemical measurements

Electrochemical experiments were carried out at room temperature in a three-electrode cell connected to an electrochemical analyzer (CHI 760e). A Pt wire and an Ag/AgCl with saturated KCl were used as counter and reference electrodes, respectively. 4 mg of the as-prepared samples or commercial Pt/C (20 wt.%, Alfa Aesar) or RuO<sub>2</sub> (76%, Johnson Matthey) were dispersed in 1 mL of mixed solvent (water : alcohol = 1 : 1 (v/v)) containing 30 µL of Nafion (Dupont Inc., USA) solution by sonication to obtain a homogeneous black ink. 10 µL of the well dispersed suspensions were dropped onto a glassy carbon (GC) electrode (5 mm in diameter) and allowed to dry at room temperature (the catalyst loading: 0.20 mg cm<sup>-2</sup>). Before measurements, a stream of N<sub>2</sub> or O<sub>2</sub> flow was delivered to the electrolyte for 30 min to obtain a N<sub>2</sub> or O<sub>2</sub>-saturated solution and the cyclic voltammetry (CV) was recycled at a scan rate of 50 mV s<sup>-1</sup> until stable current. For ORR experiments, the CV curves were recorded in an O<sub>2</sub>-saturated 0.1 M KOH solution with a scan rate of 5 mV s<sup>-1</sup> at room temperature. The linear sweep voltammograms (LSV) were obtained in the O<sub>2</sub>-saturated 0.1 M KOH solution at rotation speeds varying from 400 to 2025 rpm and with a scan rate of 5 mV s<sup>-1</sup>. The number of electrons transferred (n) for the ORR can be calculated from the Koutecky-Levich (K-L) equation <sup>4</sup>:

$$\frac{1}{J} = \frac{1}{J_L} + \frac{1}{J_K} = \frac{1}{B\omega^{1/2}} + \frac{1}{J_K} \quad (1)$$

$$B = 0.2nFC_0(D_0)^{2/3}\omega^{-1/6} \quad (2)$$

where  $J$  is the measured current density,  $J_L$  and  $J_K$  is the diffusion- and kinetic-limiting current densities, respectively.  $B$  is the Levich slope which is given by (2).  $n$  is the number of electrons transferred for ORR.  $\omega$  is the rotation speed in rpm.  $F$  is the faraday constant ( $96485 \text{ C mol}^{-1}$ ).  $\nu$  is the kinetic viscosity ( $0.01 \text{ cm}^2 \text{ s}^{-1}$ ) and  $D_0$  is the diffusion coefficient of  $\text{O}_2$  in  $0.1 \text{ M KOH}$  ( $1.9 \times 10^{-5} \text{ cm}^2 \text{ s}^{-1}$ ). The bulk concentration of oxygen  $C_0$  is  $1.2 \times 10^{-6} \text{ mol cm}^{-3}$ .

For OER and HER tests, the LSV curves were obtained at a scan rate of  $10 \text{ mV s}^{-1}$  in  $1.0 \text{ M KOH}$  solution at room temperature without  $iR$  drop compensation. The CV curves were used to measure double-layer capacitance ( $C_{dl}$ ) by changing scan rates from  $10$  to  $50 \text{ mV s}^{-1}$  in the region of  $1.127 \sim 1.227 \text{ V vs RHE}$ . The Electrochemical impedance spectroscopy (EIS) was performed at potential of  $1.20 \text{ V}$  or  $1.58 \text{ V vs. RHE}$  with frequencies from  $100 \text{ kHz}$  to  $0.01 \text{ Hz}$  with an amplitude of  $5 \text{ mV}$  for HER or OER, respectively. The electrical chemical surface area (ECSA) and Turnover Frequency (TOF) calculation in details are shown in Supporting Information.

#### 4. Liquid state Zn-air battery assembly

Rechargeable Zn-air battery in a two-electrode configuration was assembled according to the following procedures. The electrolyte used for rechargeable zinc-air batteries was  $6 \text{ M KOH}$  solution containing  $0.2 \text{ M}$  zinc acetate; a polished Zn plate was used as the anode. The air electrode was prepared by drop the catalyst onto carbon paper with a loading of  $2 \text{ mg cm}^{-2}$ . The assembled rechargeable Zn-air battery was tested at discharge/charge current densities of  $10 \text{ mA cm}^{-2}$ . The cycling test was performed at ambient temperature by the recurrent galvanic pulse method, in which one cycle consists of one ten-minute discharge step and one ten-minute charge step. The blue LED ( $2.7 \text{ V}$ ) is commercially available. The specific capacity is calculated according the equation <sup>5</sup>:

$$\text{specific capacity} = \frac{\text{current} \times \text{service hours}}{\text{weight of consumed zinc}} \quad (3)$$

### 5. All-solid-state Zn–air battery assembly

A polished zinc foil (0.05 mm thickness) was used as anode. The gel polymer electrolyte was prepared as follows:<sup>6</sup> polyvinyl alcohol (PVA) gel was prepared as solid electrolyte. Typically, 2 g of PVA powder was added into 20 mL deionized water stirring at 90 °C for 120 min. Then, 1 mL 18 M KOH solution containing 0.1 M ZnCl<sub>2</sub> was added. After stirring for another 40 min, the solution was poured onto a glass plate and frozen in a freezer at -18 °C. Then, the as-prepared CoT@NC on carbon cloth and zinc foil were placed on the two sides of PVA gel, followed by pressed Ni foam as current collector next to carbon cloth. Finally, a package was used to conduct the assembly with plastic sheet.

### 6. Overall water splitting

The performance of the as-prepared CoT@NC catalyst toward overall water splitting was evaluated in 1 M KOH using a two-electrode system on a Ni foam as the carrier. The catalyst loading is 2.5 mg cm<sup>-2</sup>. The polarization curve was recorded at a scan rate of 10 mV s<sup>-1</sup>.

## Figures

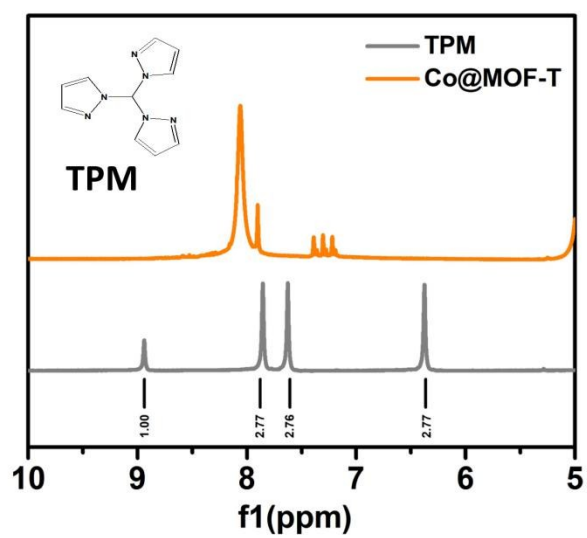

**Fig. S1.**  $^1\text{H}$ -NMR spectrum of TPM and Co@MOF-T.

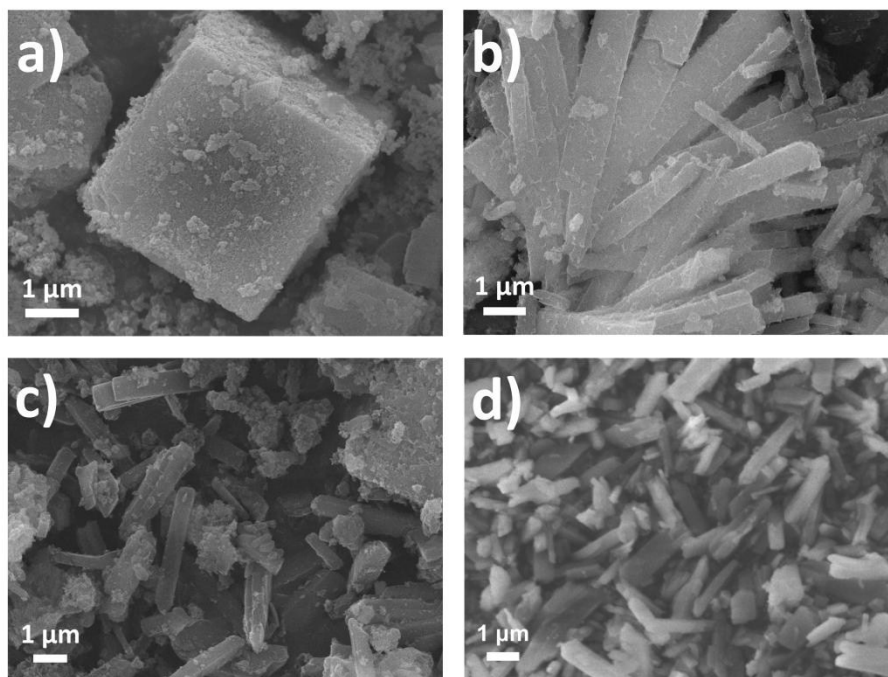

**Fig. S2.** FE-SEM images of (a) Co@MOF-T, (b) Co@MOF-I, (c) Co@MOF-E and (d) A@MOF.

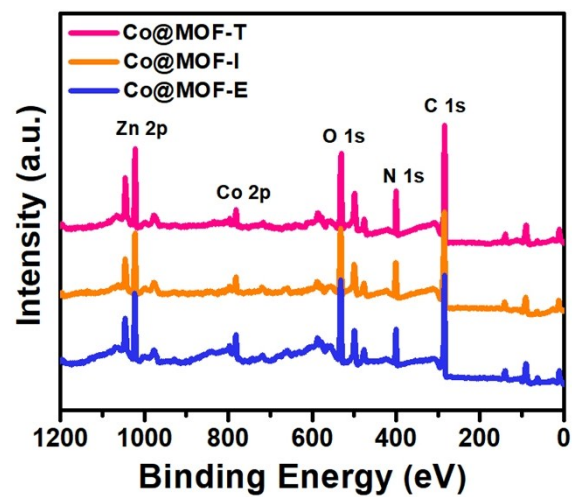

**Fig. S3.** The full XPS spectrum of Co@MOF-T, Co@MOF-I and Co@MOF-E.

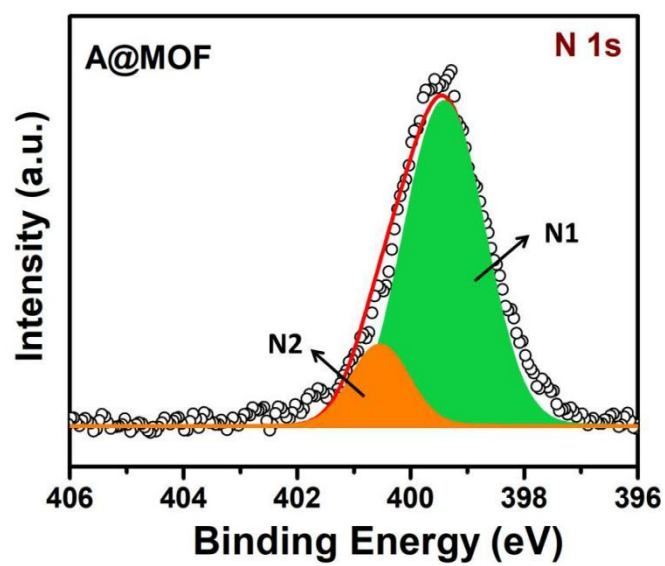

**Fig. S4.** High-resolution N1s XPS spectra of A@MOF.

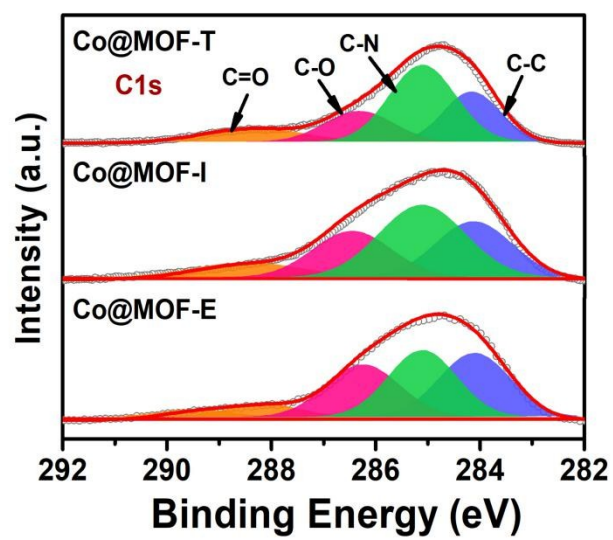

**Fig. S5.** High-resolution C1s XPS spectrum of different Co@MOF.

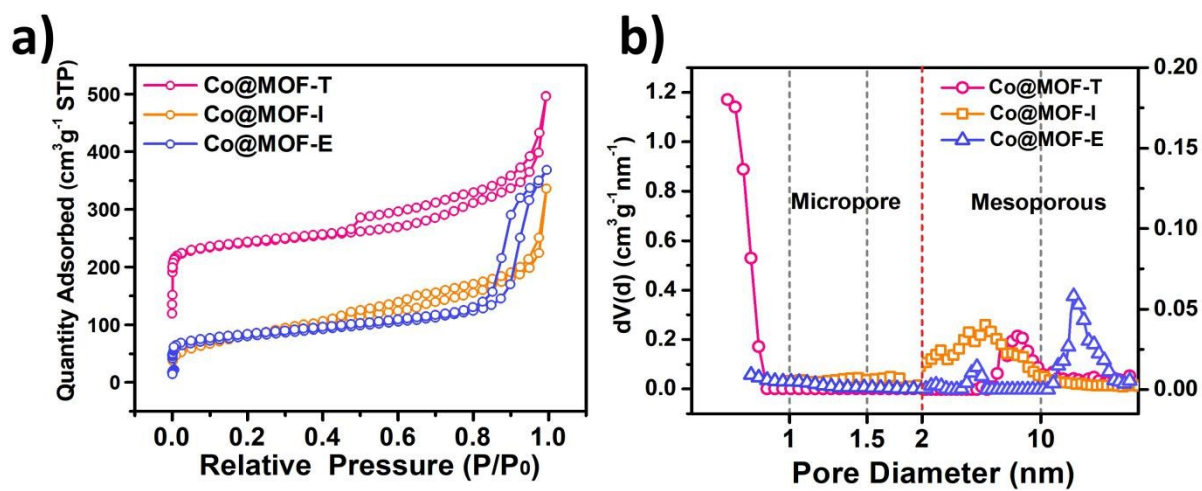

**Fig. S6.** (a) N<sub>2</sub> adsorption-desorption isotherms and (b) Pore size distributions curves for different Co@MOF.

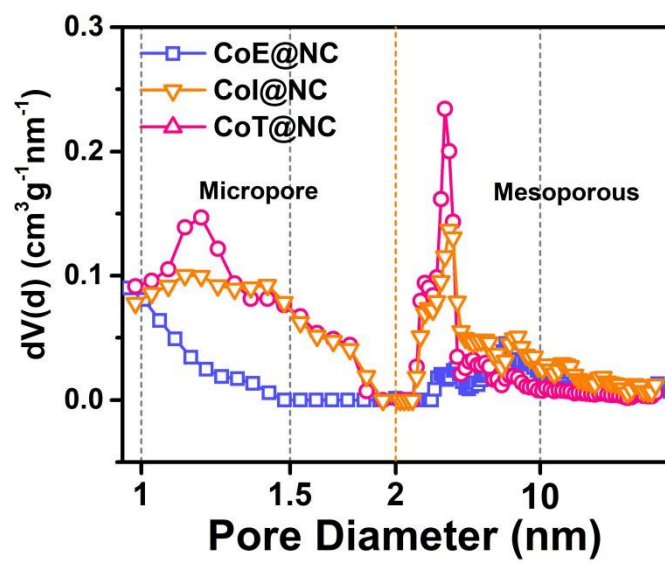

**Fig. S7.** The pore size distributions of CoT@NC, CoI@NC and CoE@NC.

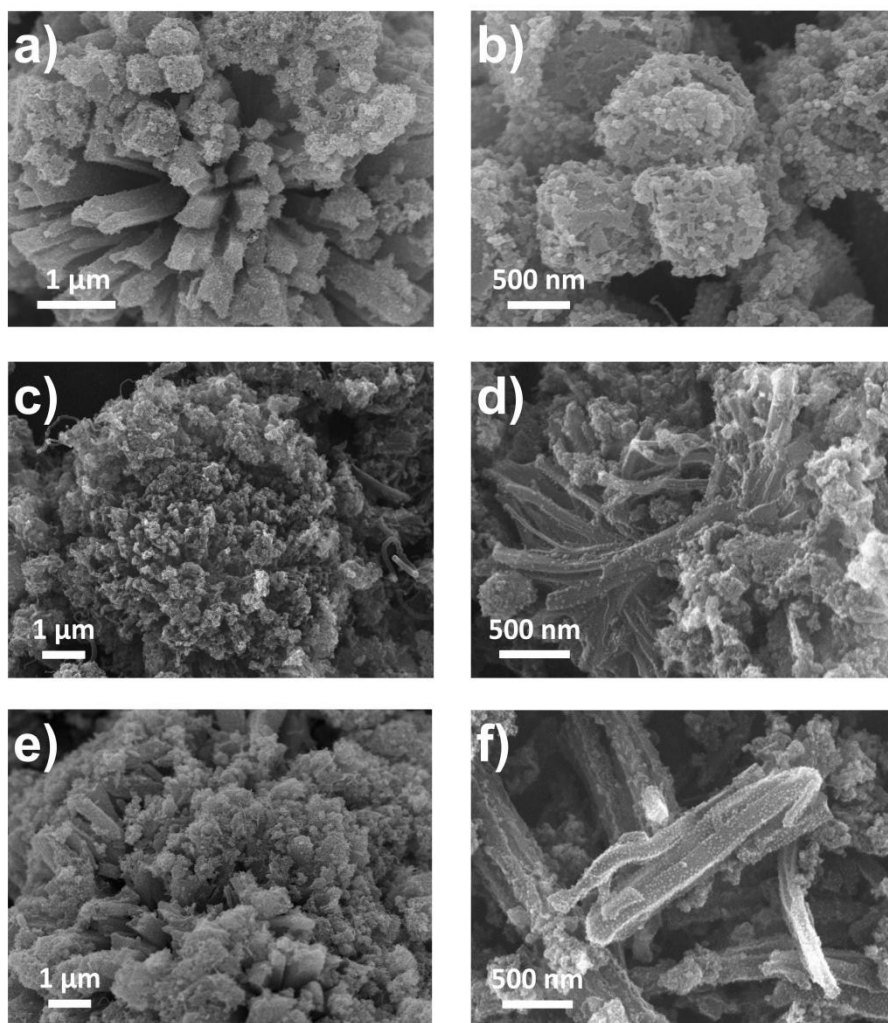

**Fig. S8.** FE-SEM images of (a,b) CoT@NC, (c,d) CoI@NC and (e,f) CoE@NC.

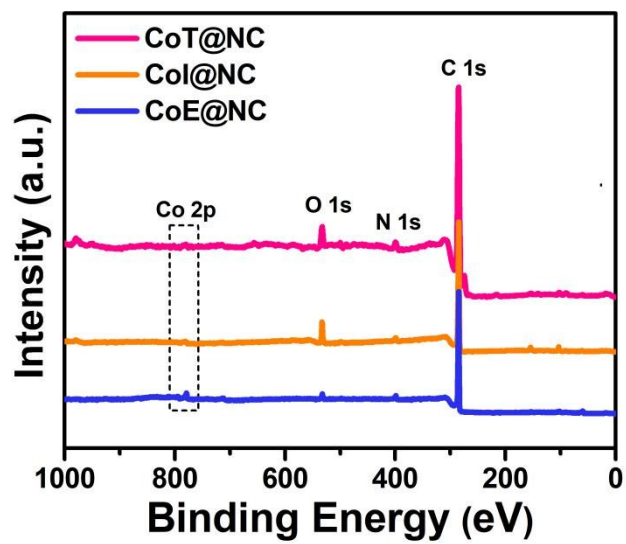

**Fig. S9.** Full XPS spectrum of CoT@NC, CoI@NC and CoE@NC.

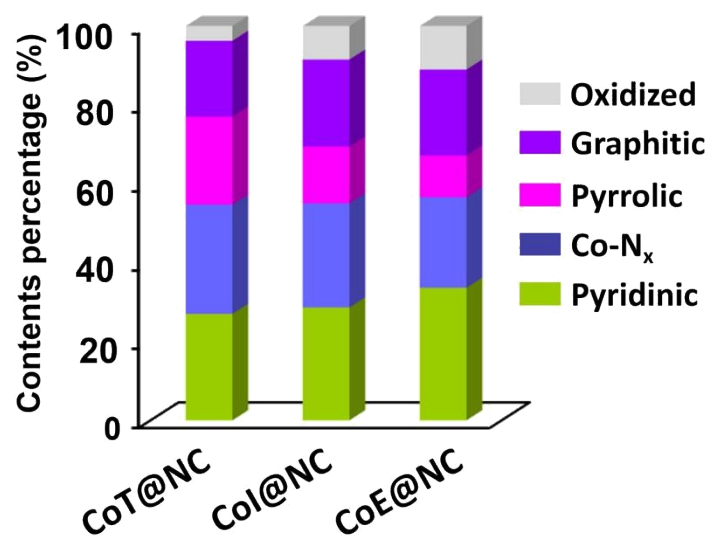

**Fig. S10.** The content percentages of different N species for different Co@NC samples.

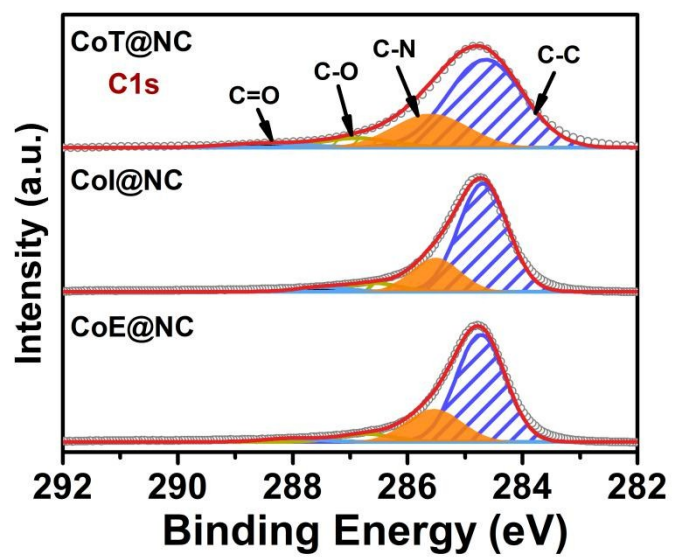

**Fig. S11.** High-resolution C 1s XPS spectrum of CoT@NC, CoI@NC and CoE@NC.

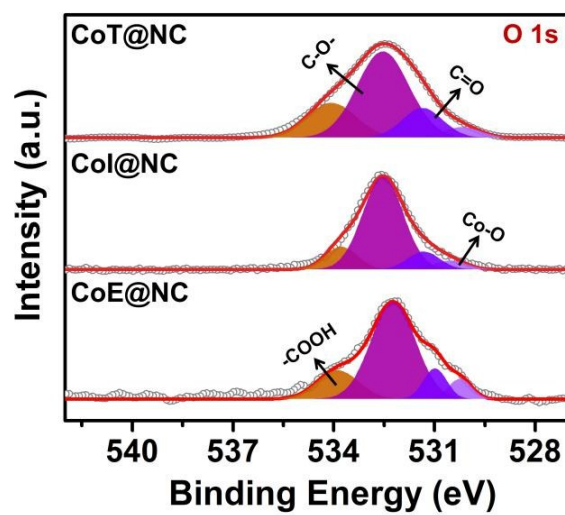

**Fig. S12.** High-resolution O 1s XPS spectrum of CoT@NC, CoI@NC and CoE@NC.

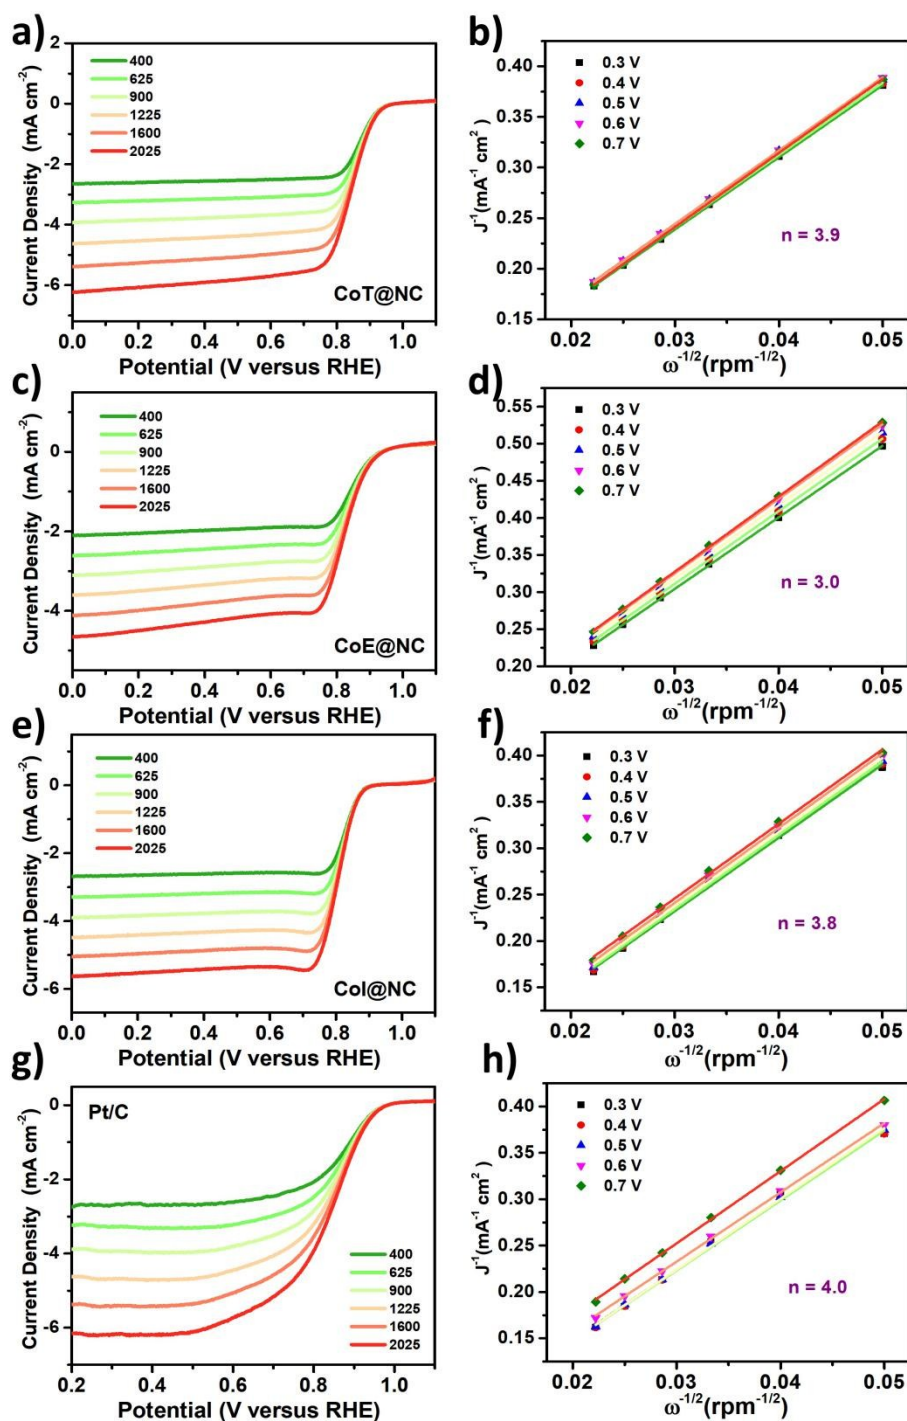

**Fig. S13.** LSV at different rotating speed in  $O_2$ -saturated 0.1 M KOH solution of (a) CoT@NC, (c) CoE@NC, (e) CoI@NC and (g) Pt/C. The corresponding Koutecky-Levich (K-L) plots of  $j^{-1}$  vs  $\omega^{-1/2}$  at different potentials derived from the RDE data.

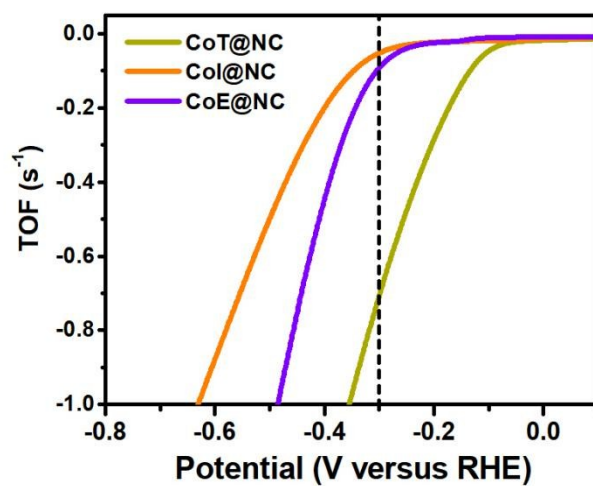

**Fig. S14.** The TOF values of as-obtained Co@NC catalysts in alkaline electrolyte.

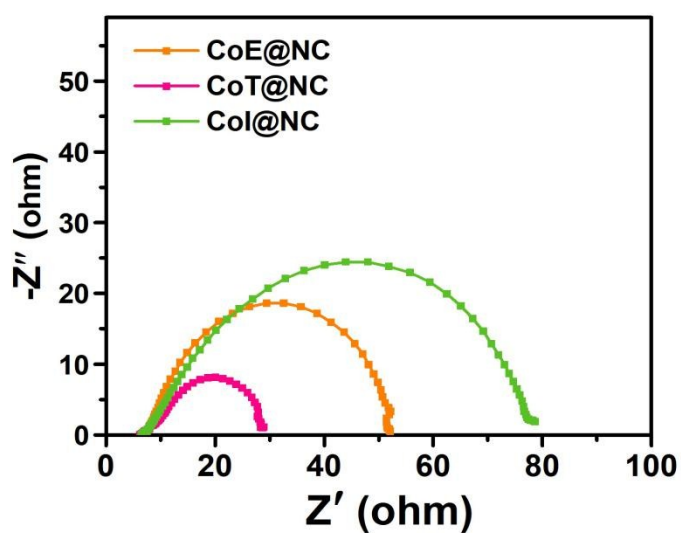

**Fig. S15.** Electrochemical impedance spectroscopy (EIS) Nyquist plots for the CoT@NC, CoI@NC and CoE@NC electrodes recorded at -1.20 V vs RHE for HER in alkaline electrolyte.

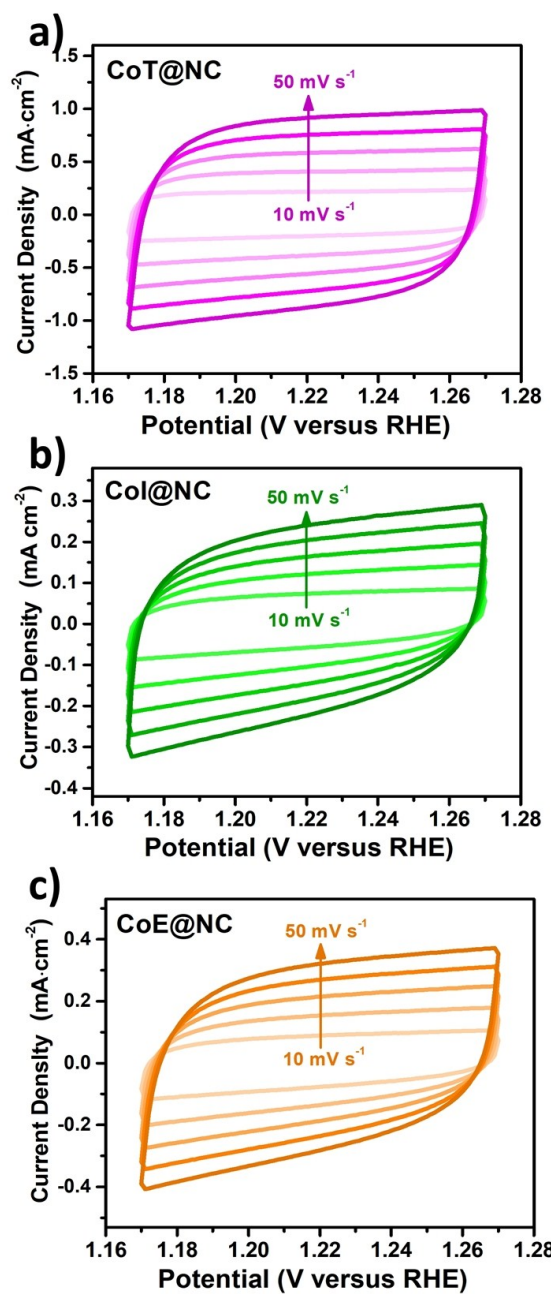

**Fig. S16.** Cyclic voltammograms (CV) curves for (a) CoT@NC, (b) CoI@NC, (c) CoE@NC in the region of 1.127 ~1.227 V vs RHE at various scan rates.

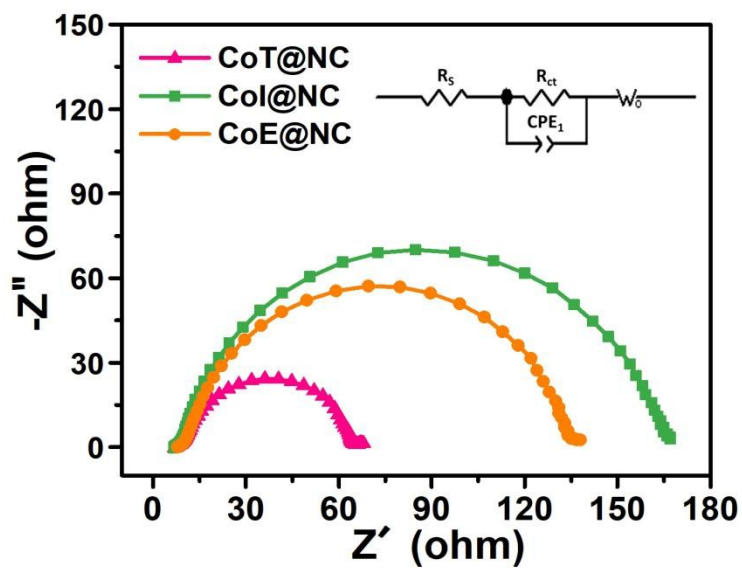

**Fig. S17.** Electrochemical impedance spectroscopy (EIS) Nyquist plots for the CoT@NC, CoI@NC and CoE@NC electrodes recorded at 1.58 V vs. RHE in OER. The data were fitted using the modified Randles circuits shown in the inset.

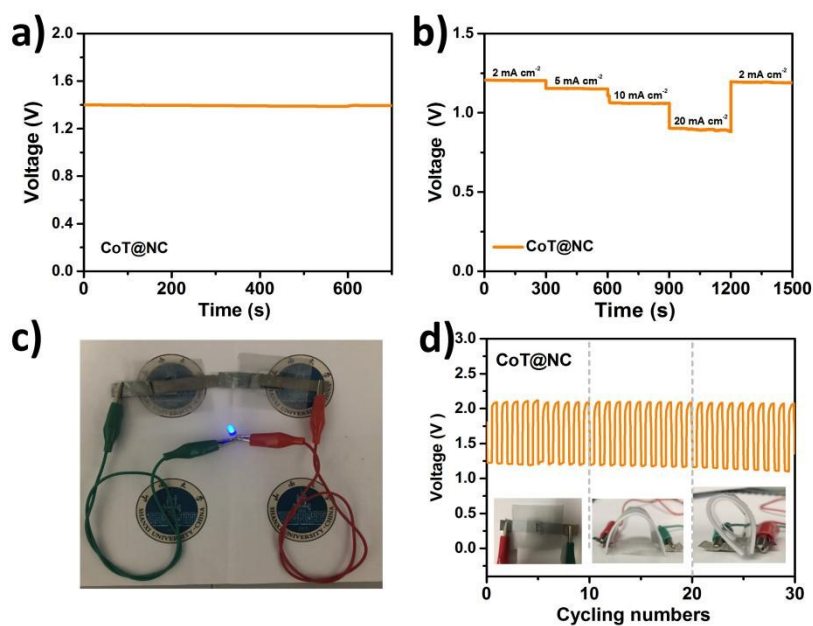

**Fig. S18.** (a) Open-circuit plots. (b) Galvanostatic discharge of CoT@NC all-solid-state Zn-air battery with different current density. (c) Photograph of a lighted blue LED ( $\approx 2.7$  V) powered by two all-solid-state Zn-air batteries interconnected in series. (d) Galvanostatic charge/discharge profile of CoT@NC Zn-air battery with each cycle of 10 min.

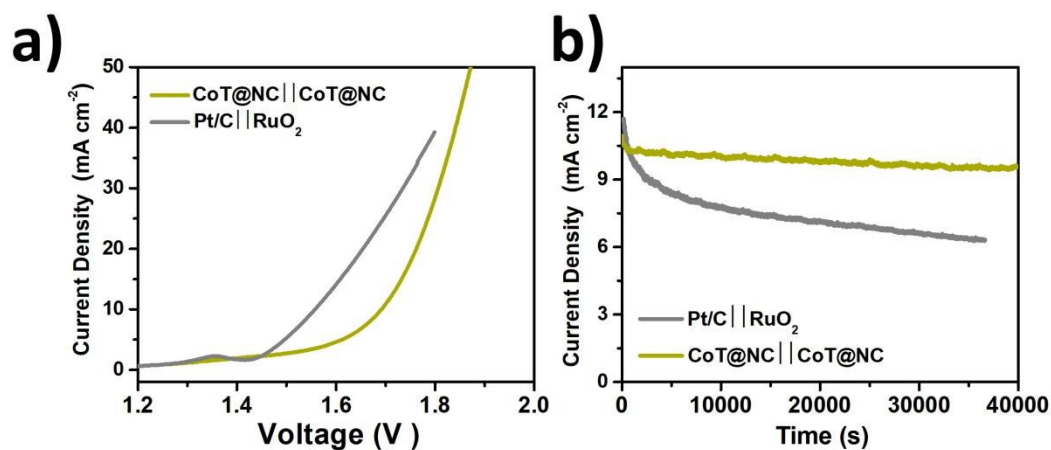

**Fig. S19.** (a) Water splitting tests by LSVs curves of CoT@NC || CoT@NC on Ni foam, or Pt/C || RuO<sub>2</sub> on Ni foam. (b) Chronoamperometric responses of CoT@NC || CoT@NC and Pt/C || RuO<sub>2</sub>.

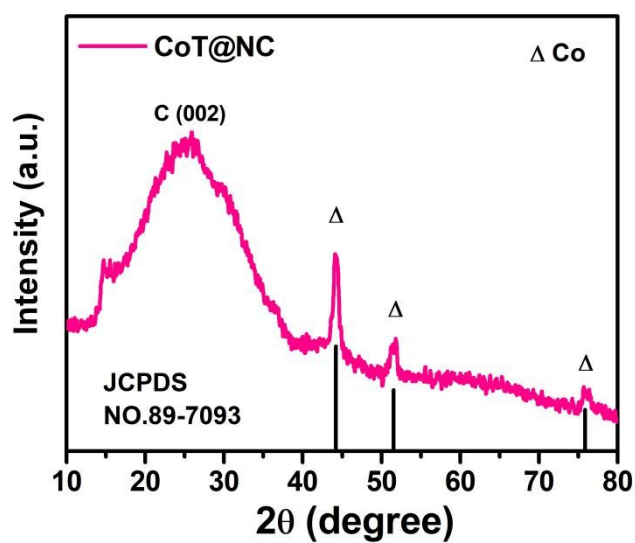

**Fig. S20.** PXRD pattern of CoT@NC after overall water-splitting reaction.

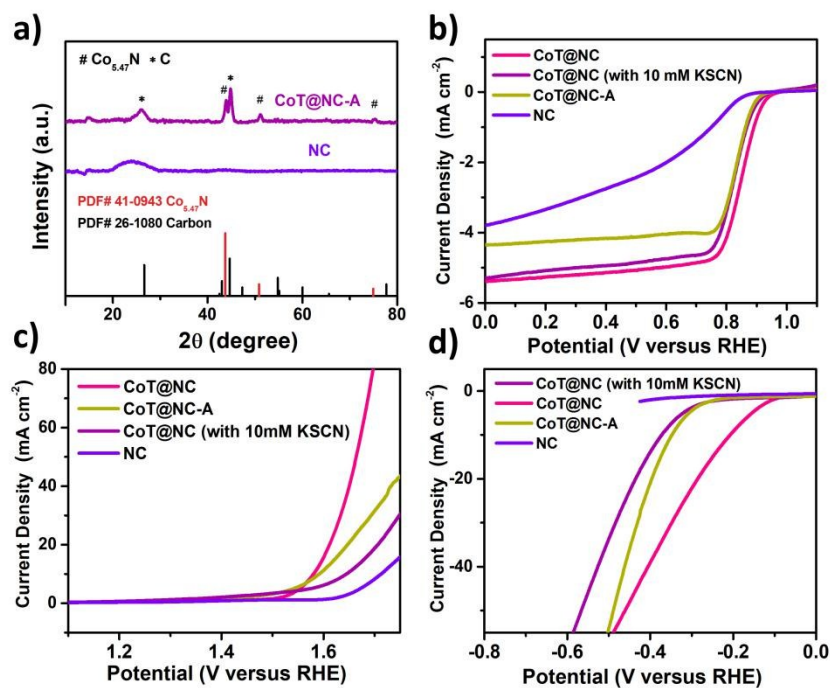

**Fig. S21.** (a) PXRD pattern of CoT@NC-A and NC. (b) LSV plots for ORR of different catalysts measured in  $\text{O}_2$ -saturated 0.1 M KOH electrolyte with or without 10 mM KSCN with a scan rate of  $5 \text{ mV s}^{-1}$ . (c) LSV plots for OER of different catalysts measured in 1 M KOH electrolyte with or without 10 mM KSCN. (d) LSV plots for HER of different catalysts measured in 1 M KOH electrolyte with or without 10 mM KSCN.

## Tables

**Table S1.** The surface chemical compositions and bulk Co contents of the series of CoT@NC obtained by XPS and ICP-MS, respectively.

| Samples         | Surface composition (at.%) |       |      |      |       | ICP (wt.%) |      |
|-----------------|----------------------------|-------|------|------|-------|------------|------|
|                 | C                          | O     | Co   | Zn   | N     | Co         | Zn   |
| <b>Co@MOF-T</b> | 64.89                      | 16.61 | 1.62 | 4.15 | 12.73 | 2.2        | 24.8 |
| <b>Co@MOF-I</b> | 64.61                      | 16.72 | 1.64 | 3.75 | 13.28 | 2.2        | 26.1 |
| <b>Co@MOF-E</b> | 60.93                      | 21.28 | 1.82 | 4.42 | 11.55 | 2.4        | 28.7 |
| <b>CoT@NC</b>   | 91.45                      | 4.71  | 0.66 | N/A  | 3.18  | 6.68       | N/A  |
| <b>CoI@NC</b>   | 87.18                      | 8.46  | 0.78 | N/A  | 3.58  | 6.98       | N/A  |
| <b>CoE@NC</b>   | 92.32                      | 3.77  | 0.98 | N/A  | 3.02  | 7.90       | N/A  |

**Table S2.** Pore characteristics of Co@MOF-T, Co@MOF-I, Co@MOF-E and the corresponding Co@NC catalysts.

| <b>Sample</b>   | <b>BET surface<br/>area / m<sup>2</sup> g<sup>-1</sup></b> | <b>Total pore volume /<br/>cm<sup>3</sup> g<sup>-1</sup></b> | <b>Average pore<br/>diameter / nm</b> |
|-----------------|------------------------------------------------------------|--------------------------------------------------------------|---------------------------------------|
| <b>Co@MOF-T</b> | 951.2                                                      | 0.77                                                         | 3.23                                  |
| <b>Co@MOF-I</b> | 294.4                                                      | 0.52                                                         | 7.07                                  |
| <b>Co@MOF-E</b> | 285.7                                                      | 0.57                                                         | 7.99                                  |
| <b>CoT@NC</b>   | 491.9                                                      | 1.48                                                         | 12.0                                  |
| <b>CoI@NC</b>   | 467.0                                                      | 0.71                                                         | 9.20                                  |
| <b>CoE@NC</b>   | 428.6                                                      | 0.99                                                         | 9.27                                  |

**Table S3.** ORR, HER and OER performance comparison of the as-prepared electrocatalysts. (the catalyst loading: 0.20 mg cm<sup>-2</sup> and dropped onto glassy carbon (GC) electrode)

| Catalysts | ORR Activity                    |                                                   |                                                 | OER Activity                                                | HER Activity                                                 |
|-----------|---------------------------------|---------------------------------------------------|-------------------------------------------------|-------------------------------------------------------------|--------------------------------------------------------------|
|           | Onset potential/<br>V (vs. RHE) | Half-wave potential ( $E_{1/2}$ )/<br>V (vs. RHE) | Limiting current<br>density/mA cm <sup>-2</sup> | Overpotential @10<br>mA cm <sup>-2</sup> /V ( $\eta_{10}$ ) | Overpotential @ 10<br>mA cm <sup>-2</sup> /V ( $\eta_{10}$ ) |
| CoT@NC    | 0.98                            | 0.86                                              | 5.39                                            | 350                                                         | 209                                                          |
| CoI@NC    | 0.96                            | 0.82                                              | 4.22                                            | 392                                                         | 367                                                          |
| CoE@NC    | 0.95                            | 0.81                                              | 5.11                                            | 376                                                         | 340                                                          |
| CoT@NC-A  | 0.93                            | 0.84                                              | 4.34                                            | 360                                                         | 348                                                          |
| NC        | 0.88                            | 0.67                                              | 3.78                                            | 480                                                         | N/A                                                          |

**Table S4.** Comparison of OER, HER and ORR catalytic activities among several recently reported bifunctional or trifunctional

## cobalt-based N-doped carbon and non-metal carbon-based catalysts

| Catalyst                 | ORR                 | HER                          | OER                                | References                                    |
|--------------------------|---------------------|------------------------------|------------------------------------|-----------------------------------------------|
|                          | Half-wave potential | $\eta@10 \text{ mA cm}^{-2}$ | $\eta@10 \text{ mA cm}^{-2}$       |                                               |
|                          | /V (vs. RHE)        | /V (vs. RHE)                 | /V (vs. RHE)                       |                                               |
|                          | 0.1 M KOH           | 1M KOH                       | 1 M KOH                            |                                               |
| CoT@NC                   | 0.86                | -0.209                       | 1.58                               | This work                                     |
| 3D-CNTA                  | 0.81                | -0.185                       | 1.59                               | Nano Energy<br>2017, 39, 626.                 |
| CoN <sub>x</sub> /NGA    | 0.83                | -0.198                       | 1.525                              | Appl. Catal. B: Environ.<br>2019, 259, 118100 |
| PANI/ZIF-67              | 0.75                | /                            | 1.56                               | Nano Energy<br>2018, 45, 127-135              |
| CoP                      | 0.62                | -0.209                       | 1.64                               | J. Mater. Chem. A,<br>2019, 7, 26607-26617    |
| Fe-Co <sub>4</sub> N@N-C | 0.83                | /                            | 1.63<br>(100 mA cm <sup>-2</sup> ) | Appl. Catal. B: Environ.<br>2019, 256, 117893 |

|                                                       |       |                     |                     |                                                                       |
|-------------------------------------------------------|-------|---------------------|---------------------|-----------------------------------------------------------------------|
| <b>CoP NC</b>                                         | 0.86  | /                   | 1.58                | Adv. Mater.<br><b>2018</b> , 30, 1705796                              |
| <b>Co@NHCC-800</b>                                    | 0.837 | /                   | 1.512               | Appl. Catal. B: Environ.<br><b>2019</b> , 254, 55-65                  |
| <b>Co,Zn@NC</b>                                       | 0.84  | /                   | 1.62                | Adv. Funct. Mater.<br><b>2017</b> , 27, 1700795                       |
| <b>ZIF-67@NPC-2</b>                                   | 0.82  | /                   | 1.64<br>(0.1 M KOH) | Appl. Catal. B Environ.<br><b>2017</b> , 205, 55-67                   |
| <b>NiCoOS</b>                                         | 0.79  | -0.3<br>(0.1 M KOH) | 1.7<br>(0.1 M KOH)  | Nano Energy<br><b>2019</b> , 58, 680-686                              |
| <b>Co<sub>3.2</sub>Fe<sub>0.8</sub>N/MNC<br/>-100</b> | 0.784 | -0.315              | 1.58                | ACS Appl. Nano Mater.<br><b>2019</b> , DOI:<br>10.1021/acsanm.9b01361 |
| <b>NOGB-800</b>                                       | 0.75  | -0.22               | 1.63                | Adv. Energy Mater.<br><b>2019</b> , 9, 1803867.                       |

**Table S5** Comparison of the performances of recently reported high-performance rechargeable Zn-air batteries using various non-noble metal electrocatalysts.

| <b>Catalyst</b>                   | <b>Loading<br/>Mass<br/>/mg cm<sup>-2</sup></b> | <b>Substrate</b>    | <b>Peak power<br/>density<br/>/mW cm<sup>-2</sup></b> | <b>Cycling<br/>current density<br/>/mA cm<sup>-2</sup></b> | <b>Cycling conditions</b>          | <b>References</b>                                     |
|-----------------------------------|-------------------------------------------------|---------------------|-------------------------------------------------------|------------------------------------------------------------|------------------------------------|-------------------------------------------------------|
| <b>CoT@NC</b>                     | <b>2</b>                                        | <b>carbon paper</b> | <b>146</b>                                            | <b>10</b>                                                  | <b>20 min/cycle for 350 cycles</b> | <b>This work</b>                                      |
| <b>Co-N<sub>x</sub>/C NRA</b>     | <b>1</b>                                        | <b>carbon paper</b> | 193.2                                                 | /                                                          | 20 min/cycle for 240 cycles        | Adv. Funct. Mater.<br><b>2018</b> , 28, 1704638       |
| <b>Co<sub>3</sub>C-NB</b>         | <b>1</b>                                        | <b>carbon paper</b> | 45.5                                                  | 5                                                          | 180 h                              | J. Mater. Chem. A,<br><b>2019</b> ,7, 14904-14915     |
| <b>7.1%Cu-Co<sub>2</sub>P@NPC</b> | <b>1</b>                                        | <b>carbon cloth</b> | 236.1                                                 | 10                                                         | 480 cycles for<br>160 h            | J. Mater. Chem. A,<br><b>2019</b> ,7, 21232-21243     |
| <b>CoN<sub>x</sub>/NGA</b>        | <b>1</b>                                        | <b>nickel foam</b>  | /                                                     | 10                                                         | 12 h                               | Appl. Catal. B: Environ.<br><b>2019</b> , 259, 118100 |
| <b>Co@NHCC-800</b>                | /                                               | <b>carbon cloth</b> | 248                                                   | /                                                          | 12 h                               | Appl. Catal. B: Environ.<br><b>2019</b> , 254, 55-65  |
| <b>PPy/FeTCPP/Co</b>              | <b>0.5</b>                                      | <b>carbon paper</b> | /                                                     | 5                                                          | 62 cycles                          | Adv. Funct. Mater.<br><b>2017</b> , 27, 1606497.      |

|                                          |            |                               |       |                                      |                                |                                                       |
|------------------------------------------|------------|-------------------------------|-------|--------------------------------------|--------------------------------|-------------------------------------------------------|
| <b>NiO/CoN PINWs</b>                     | /          | <b>self-supported</b>         | 79.6  | Charging of 50 /<br>discharging of 1 | 20 min/cycle for 25<br>cycles  | ACS Nano.<br><b>2017</b> , 11, 2275.                  |
| <b>Fe-Co<sub>4</sub>N@N-C</b>            | /          | <b>carbon paper</b>           | 105   | 5                                    | 10 min/cycle for 220<br>cycles | Appl. Catal. B: Environ.<br><b>2019</b> , 256, 117893 |
| <b>3D-CNTA</b>                           | <b>2</b>   | <b>carbon cloth</b>           | 157.3 | 10                                   | 10 min/cycle for 240<br>cycles | Nano Energy<br><b>2017</b> , 39, 626.                 |
| <b>CoS<sub>x</sub>@PCN/rGO</b>           | <b>2</b>   | <b>carbon paper</b>           | /     | /                                    | 400 s/cycle for<br>394cycles   | Adv. Energy Mater.<br><b>2018</b> , 8, 1701642        |
| <b>Co/CNFs (1000)</b>                    | /          | <b>self-supported</b>         | 163   | 15                                   | 40 min/cycle for 300<br>cycles | Adv. Mater.<br><b>2019</b> , 31, 1808043.             |
| <b>NC-Co<sub>3</sub>O<sub>4</sub>-90</b> | /          | <b>carbon paper</b>           | 82    | 1                                    | 20 min/cycle for<br>60 cycles  | Adv. Mater.<br><b>2017</b> , 29, 1704117.             |
| <b>MnO/Co/PGC</b>                        | <b>10</b>  | <b>carbon fiber<br/>paper</b> | 172   | 10                                   | 20 min/cycle for<br>350 cycles | Adv. Mater.<br><b>2019</b> , 1902339                  |
| <b>CoS<sub>x</sub>/Co-NC-800</b>         | <b>1</b>   | <b>carbon paper</b>           | 103   | 5                                    | 12 min/cycle for<br>450 cycles | Adv. Funct. Mater.<br><b>2019</b> , 1904481           |
| <b>NGM-Co</b>                            | <b>0.5</b> | <b>carbon cloth</b>           | 147   | /                                    | 1350 s/cycle for<br>160 cycles | Adv. Mater.<br><b>2017</b> , 29, 1703185              |

**Note S1 Crystallite size in the plane ( $L_a$ ), perpendicular to the graphene planes ( $L_c$ ) and interlayer spacing ( $d_{002}$ ) calculations.**

The average in-plane graphitic crystallite size ( $L_a$ ) was estimated from Raman spectra using equation (1) and (2) <sup>7</sup>:

$$L_a = C(\lambda_L)(I_D/I_G)^{-1} \quad (1)$$

where  $C(\lambda_L)$  is the wavelength pre-factor and  $I_D$  and  $I_G$  are the intensity of the D and G bands respectively. Matthews et al. <sup>8</sup> considered a wavelength dependency of C and presented the following relation (2):

$$C(\lambda_L) \approx C_0 + \lambda_L C_1 \quad (2)$$

where  $C_0 = -12.6$  nm and  $C_1 = 0.033$ . The  $C(\lambda_L)$  value was calculated using equation (2), which is reported valid for  $400 \text{ nm} < \lambda_L < 700 \text{ nm}$ . The  $\lambda_L$  is the laser source wavelength (514 nm).

The perpendicular to the graphene planes ( $L_c$ ) and interlayer spacing ( $d_{002}$ ) can be calculated from XRD peak positions using the Scherrer equation (2) and Bragg equation (3), respectively:

$$L_c = \frac{k\lambda}{\beta \cos \theta} \quad (3)$$

$$d_{002} = \frac{\lambda}{2 \sin \theta} \quad (4)$$

where  $\beta$  is the full width at half-maximum (FWHM) of the Carbon diffraction peak,  $\lambda = 0.154056$  nm,  $\theta$  in radians, k the Scherrer constant.

## Note S2 Turnover frequency calculations.

To calculate the per-site turnover frequency (TOF), we used the following formula:<sup>9, 10</sup>

$$TOF(s^{-1}) = \frac{J \times A}{4 \times n \times F} \quad (5)$$

where A and F represent the surface area of the anode and the Faraday constant, respectively.

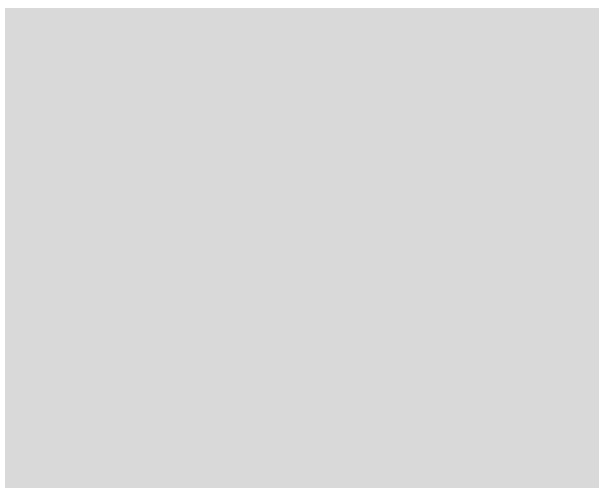

**Figure S22.** CV curves of as-obtained Co@NC catalysts in pH 7 from -0.2 to 0.6 V versus RHE at scan rate of 50 mV s<sup>-1</sup>.

## References

1. Reger, D.L.; Grattan, T.C.; Brown, K.J.; Little, C.A.; Lamba, J.J.S.; Rheingold, A.L.; Sommer, R.D.J.J.o.O.C., Syntheses of tris(pyrazolyl)methane ligands and {[tris(pyrazolyl)methane]Mn(CO)<sub>3</sub>}SO<sub>3</sub>CF<sub>3</sub> complexes: comparison of ligand donor properties. *J. Organomet. Chem.* **2000**, 607 (1), 120-128.
2. Timothy Astley, J.M.G., Michael A. Hitchman and Edward R. T. Tiekink Structure, spectroscopic and angular-overlap studies of tris(pyrazol-1-yl)methane complexes. *J. Chem. Soc., Dalton Trans.*, **1993**, 509-515.

3. Wang, J.-H.; Luo, D.; Li, M.; Li, D., Local Deprotonation Enables Cation Exchange, Porosity Modulation, and Tunable Adsorption Selectivity in a Metal–Organic Framework. *Cryst. Growth Des.* **2017**, 17 (6), 3387-3394.
4. Chen, B.; He, X.; Yin, F.; Wang, H.; Liu, D.-J.; Shi, R.; Chen, J.; Yin, H., MO-Co@N-Doped Carbon (M = Zn or Co): Vital Roles of Inactive Zn and Highly Efficient Activity toward Oxygen Reduction/Evolution Reactions for Rechargeable Zn-Air Battery. *Adv. Funct. Mater.* **2017**, 27 (37).
5. Cao, Z.; Hu, H.; Wu, M.; Tang, K.; Jiang, T., Planar all-solid-state rechargeable Zn–air batteries for compact wearable energy storage. *J. Mater. Chem. A* **2019**, 7 (29), 17581-17593.
6. Wang, T.; Kou, Z.; Mu, S.; Liu, J.; He, D.; Amiin, I.S.; Meng, W.; Zhou, K.; Luo, Z.; Chaemchuen, S.; Verpoort, F., 2D Dual-Metal Zeolitic-Imidazolate-Framework-(ZIF)-Derived Bifunctional Air Electrodes with Ultrahigh Electrochemical Properties for Rechargeable Zinc-Air Batteries. *Adv. Funct. Mater.* **2018**, 28 (5), 1705048.
7. Sonibare, O.O.; Haeger, T.; Foley, S.F., Structural characterization of Nigerian coals by X-ray diffraction, Raman and FTIR spectroscopy. *Energy* **2010**, 35 (12), 5347-5353.
8. Matthews, M.J.; Pimenta, M.A.; Dresselhaus, G.; Dresselhaus, M.S.; Endo, M.J.P.R.B., Origin of Dispersive Effects of the Raman D Band in Carbon Materials. **1999**, 59 (10), 6585-6588.
9. Ma, X.; Li, K.; Zhang, X.; Wei, B.; Yang, H.; Liu, L.; Zhang, M.; Zhang, X.; Chen, Y., The surface engineering of cobalt carbide spheres through N, B co-doping achieved by room-temperature in situ anchoring effects for active and durable multifunctional electrocatalysts. *J. Mater. Chem. A* **2019**, 7 (24), 14904-14915.
10. Xiao, W.; Liu, P.; Zhang, J.; Song, W.; Feng, Y.P.; Gao, D.; Ding, J., Dual-Functional N Dopants in Edges and Basal Plane of MoS<sub>2</sub> Nanosheets Toward Efficient and Durable Hydrogen Evolution. *Adv. Energy Mater.* **2017**, 7 (7), 1602086.
